# Supplementary material for: Metabolomic fingerprint of coronary blood in STEMI patients depends on the ischemic time and inflammatory state
Source: PubMed Central journal article supplement (PMC6342950; doi:10.1038/s41598-018-36415-y), 2019-01-22
Supplement: 41598_2018_36415_MOESM1_ESM.pdf [file 41598_2018_36415_MOESM1_ESM.pdf]

## **Metabolomic fingerprint of coronary blood in STEMI patients**

**depends on the ischemic time and inflammatory state**

**<sup>a</sup>Martino Deidda, MD PhD; <sup>b</sup>Cristina Piras, PhD; <sup>c</sup>Giulio Binaghi, MD PhD;  
<sup>c</sup>Damiana Congia, MD; <sup>c</sup>Alessandro Pani, Md; <sup>d</sup>Alberto Boi, MD; <sup>d</sup>Francesco  
Sanna, MD; <sup>d</sup>Angelica Rossi, MD; <sup>d</sup>Bruno Loi, MD; <sup>a</sup>Christian Cadeddu  
Dessalvi, MD PhD FESC; <sup>b</sup>Luigi Atzori, MD; <sup>c</sup>Maurizio Porcu, MD FESC;  
<sup>a</sup>Giuseppe Mercurio, MD**

<sup>a</sup> Department of Medical Sciences and Public Health, University of Cagliari; <sup>b</sup>  
Department of Biomedical Sciences, University of Cagliari; <sup>c</sup> Department of  
Cardiology, G. Brotzu Hospital; <sup>d</sup> Catheterization Lab, G. Brotzu Hospital, Cagliari,  
Sardinia, Italy

**Figure 1S.** 500 MHz  $^1\text{H}$  NMR spectra of plasma extracts obtained from a) short total ischemic time b) long total ischemic time.

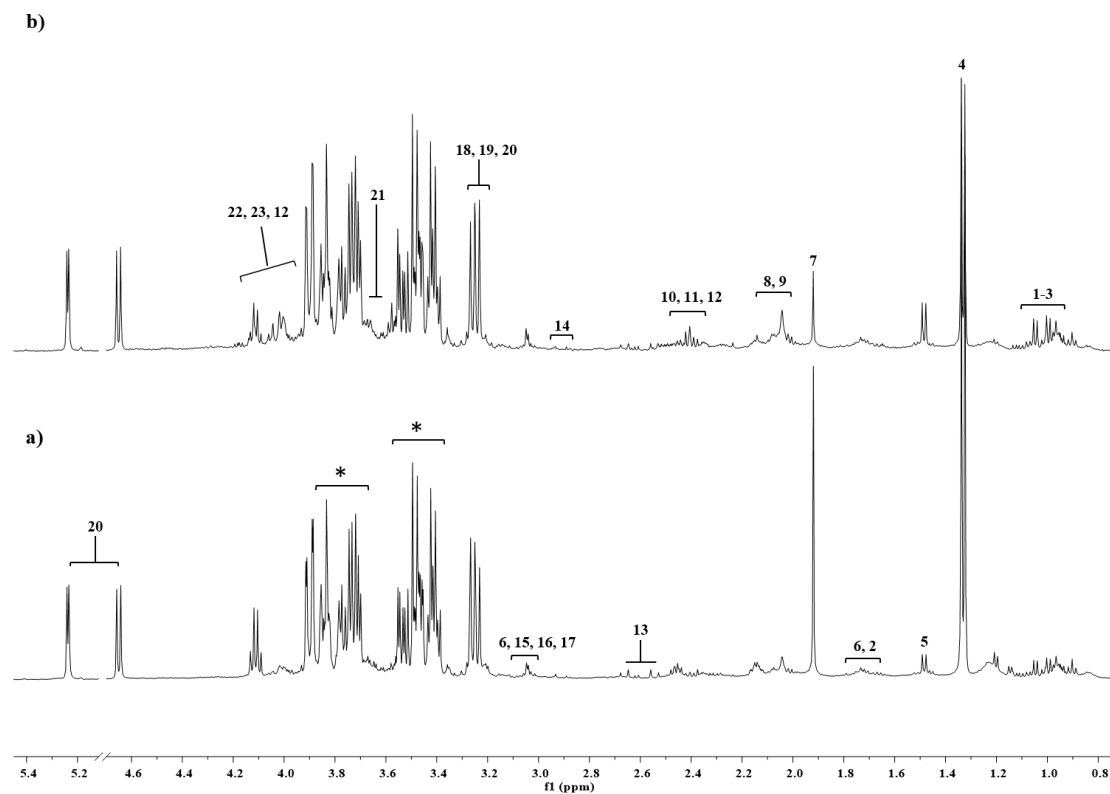

**Peaks:** 1, Isoleucine; 2, Leucine; 3, Valine; 4, Lactate; 5, Alanine; 6, Lysine; 7, Acetate; 8, N-acetylgroups; 9, Proline; 10, Glutamine; 11, Glutamate; 12, Pyroglutamate; 13, Citrate; 14, Asparagine; 15, Creatine; 16, Creatinine; 17, Ornithine; 18, Choline; 19, Phosphocholine; 20, Glucose; 21, Myo-Inositol; 22, 2-phosphoglycerate; 23, Serine. \* Resonances of contrast agent.
